# Supplementary material for: Targeting stromal cell Syndecan‐2 reduces breast tumour growth, metastasis and limits immune evasion
Source: PubMed Central journal article supplement (PMC7839764; doi:10.1002/ijc.33383), 2020-12-02
Supplement: IJC-148-1245-s001.pdf [file IJC-148-1245-s001.pdf]

1 **TITLE PAGE**

2 **Targeting stromal cell Syndecan-2 reduces breast tumour growth, metastasis and**  
3 **limits immune evasion.**

4 **Running title:** Syndecan-2<sup>+</sup>-stromal cells enhance breast tumourigenesis

5 Paul Loftus<sup>1,2</sup>, Luke Watson<sup>1</sup>, Laura M Deedigan<sup>2</sup>, Eva Camarillo-Retamosa<sup>2</sup>, Róisín M  
6 Dwyer<sup>1</sup>, Lisa O’Flynn<sup>2</sup>, Matthew Griffin<sup>1</sup>, Timothy O’Brien<sup>1</sup>, Michael Kerin<sup>1</sup>, Stephen J  
7 Elliman<sup>2</sup>, Laura R Barkley<sup>1\*</sup>.

8 Table of contents

9 **Supplementary Figure 1**

10 **Supplementary Figure 2**

11 **Supplementary Figure 3**

12 **Supplementary Figure 4**

13 **Supplementary Figure 5**

14

Supplementary Figure 1

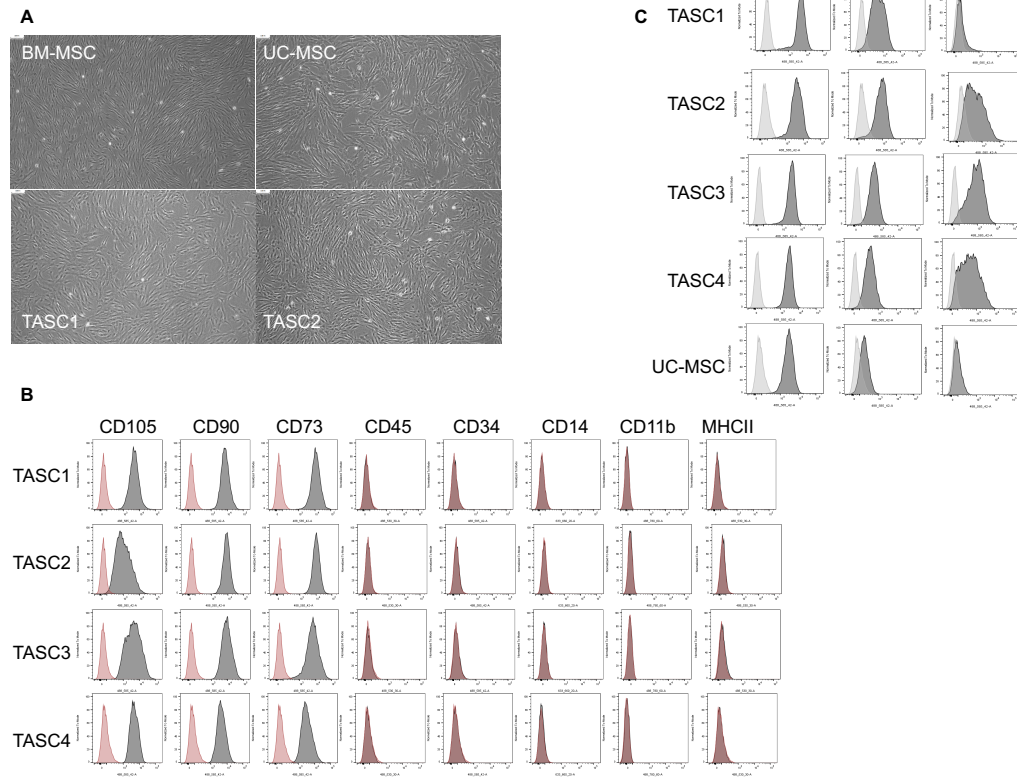

15

16

17 **Supplementary Figure 1. Comparison between TASCs and normal MSCs.** (A)

18 Morphological comparison of TASCs to normal bone marrow (BM-MSC) and umbilical

19 cord-derived (UC-MSC) MSCs at passage 2. (B) TASCs were isolated, cultured and

20 expanded from human breast cancer tissues. Flow cytometry analysis confirmed that cells

21 expressed CD90, CD105, CD73, and were negative for CD45, CD34, CD14, CD11b, and

22 MHC-II expression. (C) Flow cytometry analysis confirmed that TASCs from 4 different

23 donors expressed NG2, PDGFR $\alpha$  and gp38.

24

Supplementary Figure 2

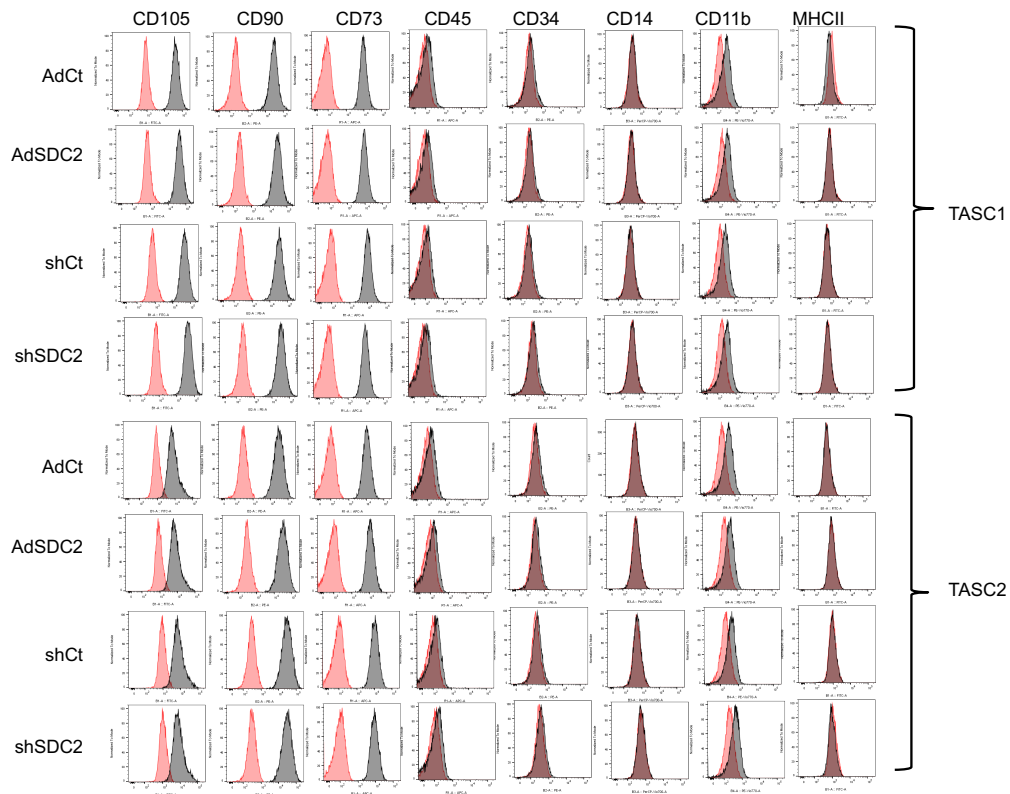

25

26 **Supplementary Figure 2. Adenovirus transduction does not effect cell surface expression**  
27 **of TASCs.** TASCs were transduced with adenovirus control (AdCt), adenovirus SDC2  
28 (AdSDC2), adenovirus shRNA control (shCt) or adenovirus shRNA-SDC2 (shSDC2) for 48  
29 hours. Flow cytometry analysis confirmed that cells still expressed CD90, CD105, CD73, and  
30 were negative for CD45, CD34, CD14, CD11b, and MHC-II expression.

31

Supplementary Figure 3

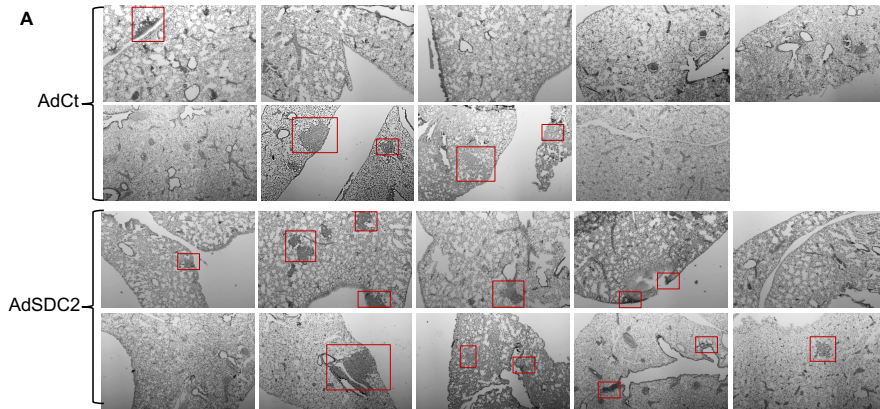

32

33 **Supplementary Figure 3. Overexpression of stromal SDC2 increases metastasis to the**  
34 **lung in a xenograft breast cancer model.** (A) NOD:SCID mice were injected with  
35 TASCs:MDA-MB-231 into the mamary fat pad and approximately 12 weeks later lungs were  
36 removed and examined for metastatic nodules by H&E staining. Representative images of  
37 H&E stained lungs of AdCt (n=9) and AdSDC2 (n=10) mice. Red boxes indicate metastatic  
38 lesions.

39

Supplementary Figure 4

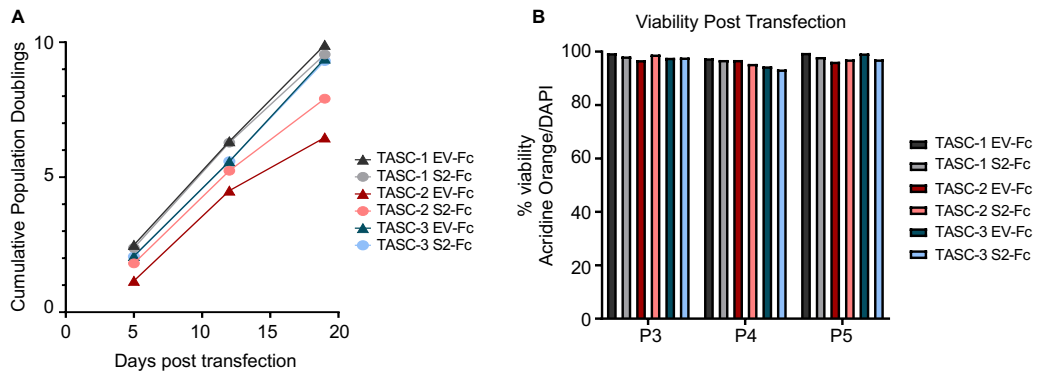

40

41

42 **Supplementary Figure 4. Overexpression of syndecan-2-peptide does not effect**  
43 **proliferation or viability of TASCs.** (A) Cumulative population doublings after transfection  
44 of TASCs with empty vector Fc control (EV-Fc) or Syndecan-2-Fc peptide (S2-Fc) were  
45 measured. (B) Viability of EV-Fc or S2-Fc transfected TASCs were determined by Acridine  
46 orange/DAPI co-stain and analysed by Chemometec Nucleocounter® NC-200.

47

Supplementary Figure 5

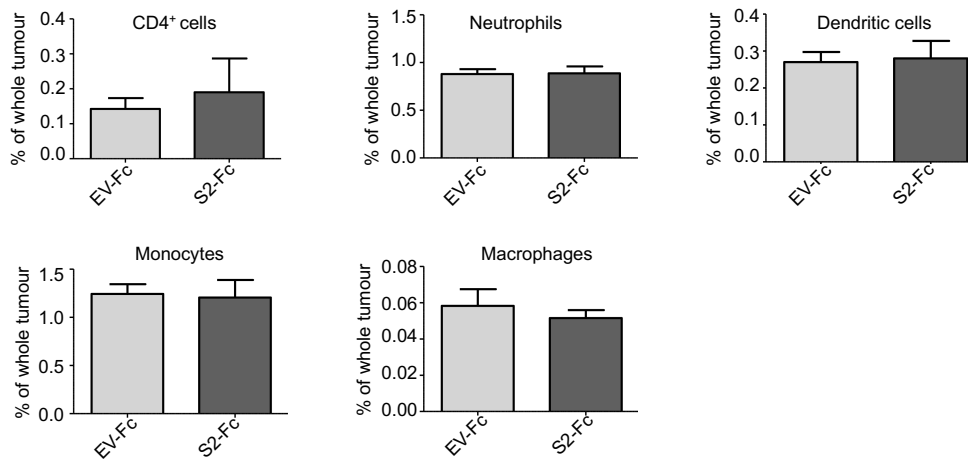

49

50 **Supplementary Figure 5. Effect of TASC-SDC2-peptide expression on immune cell**  
 51 **content within the TME.** EO771 tumours containing TASCs expressing S2-Fc or EV-Fc  
 52 were excised and flow cytometry analysis of tumours was performed to determine the  
 53 percentage of CD4<sup>+</sup> T cells, neutrophils (CD11b<sup>+</sup> Ly6G<sup>+</sup>), dendritic cells (Ly6G<sup>-</sup> CD11b<sup>-</sup>  
 54 CD11c<sup>+</sup>), monocytes (Ly6G<sup>-</sup> CD11b<sup>+</sup> CD11c<sup>-</sup> Ly6C<sup>hi</sup> F4/80<sup>mid-low</sup>) and macrophages (Ly6G<sup>-</sup>  
 55 CD11b<sup>+</sup> CD11c<sup>-</sup> Ly6C<sup>lo</sup>, F4/80<sup>+</sup>) within EV-Fc and S2-Fc expressing tumours.

56
